# Supplementary material for: A Framework for Implementing Course-Based Undergraduate Research Experiences (CUREs) in Freshman Biology Labs
Source: Oxford University Press journal article supplement (doi:10.1525/abt.2016.78.6.448), 2016-07-29
Supplement: abt.2016.78.6.448-f6.docx [file abt.2016.78.6.448-f6.docx]

**Poster #1 – Please attach a picture**

**Title: Location:**

**Authors:**

**Was the main research question clear? What was it?**

**Was the main conclusion clearly stated? What was it?**

**Were the major ideas of each table/figure clearly stated in the table/figure legend? Were the tables/figures themselves clear and easy to understand? Please comment.**

**What did you like best about this poster?**

**What did you think was the worst thing about this poster?**

**Poster #2 – Please attach a picture**

**Title: Location:**

**Authors:**

**Was the main research question clear? What was it?**

**Was the main conclusion clearly stated? What was it?**

**Were the major ideas of each table/figure clearly stated in the table/figure legend? Were the tables/figures themselves clear and easy to understand? Please comment.**

**What did you like best about this poster?**

**What did you think was the worst thing about this poster?**
