# Supplementary material for: A Framework for Implementing Course-Based Undergraduate Research Experiences (CUREs) in Freshman Biology Labs
Source: Oxford University Press journal article supplement (doi:10.1525/abt.2016.78.6.448), 2016-07-29
Supplement: abt.2016.78.6.448-f7.docx [file abt.2016.78.6.448-f7.docx]

**Name: Section:**

**1) List all the members of your group (including yourself):**

**2) Please evaluate your performance in your group, in terms of equal contribution towards the group project (poster).**

**3) Please evaluate each of your group members’ performances, in terms of equal contribution towards the group project (poster).**

**4) Peer-Evaluation of Poster Presentations:**

Please evaluate the performance in order of their presentation. Leave the columns for your group blank.

Please rate on a scale of 1-5 where: **5** = excellent ; **4** = very good ; **3** = good ; **2** = needs some improvement ; **1** = needs a lot of improvement

|  | **Group 1** | **Group 2** | **Group 3** | **Group 4** | **Group 5** | **Group 6** | **Group 7** |
| --- | --- | --- | --- | --- | --- | --- | --- |
| **Introduction** |  |  |  |  |  |  |  |
| **Methods** |  |  |  |  |  |  |  |
| **Results** |  |  |  |  |  |  |  |
| **Conclusion** |  |  |  |  |  |  |  |
| **Overall** |  |  |  |  |  |  |  |
| **Total** |  |  |  |  |  |  |  |

*Optional:* Please make any additional comments you wish to make about any group’s work:

**5) Which group’s poster presentation (other than your own) did you like the most and why?** *Please only give a brief response (1-2 sentences).*

**6) Which group’s poster presentation (other than your own) did you like the least and why?** *Please only give a brief response (1-2 sentences).*
